# Supplementary material for: Comparing Prescriptive and Descriptive Gender Stereotypes About Children, Adults, and the Elderly
Source: PubMed Central journal article supplement (PMC6028777; doi:10.3389/fpsyg.2018.01086), 2018-06-26
Supplement: Table_1.pdf [file Table_1.pdf]

## *Supplementary Material*

### **Prescriptive and Descriptive Gender Stereotypes about Children, Adults, and the Elderly**

**Anne M. Koenig\***

**\* Correspondence: [akoenig@sandiego.edu](mailto:akoenig@sandiego.edu)**

Tables S1-S4 present the effect sizes for prescriptive and descriptive stereotypes in each study separately (roughly sorted by size) and the mean desirability rating for men and women, only for the characteristics that met the criteria for a prescriptive or proscriptive stereotype (similar to tables from Rudman et al., 2012).

Table S1

*Prescriptive Stereotypes, Mean Desirability Ratings, and Descriptive Stereotypes for Males and Females by Age Group in Study 1*

|                               | Prescriptive<br><i>d</i> | Male<br><i>M</i> | Female<br><i>M</i> | Descriptive<br><i>d</i> | Prescriptive<br><i>d</i> | Male<br><i>M</i> | Female<br><i>M</i> | Descriptive<br><i>d</i> | Prescriptive<br><i>d</i> | Male<br><i>M</i> | Female<br><i>M</i> | Descriptive<br><i>d</i> |
|-------------------------------|--------------------------|------------------|--------------------|-------------------------|--------------------------|------------------|--------------------|-------------------------|--------------------------|------------------|--------------------|-------------------------|
|                               | Elementary-aged          |                  |                    |                         | Adults                   |                  |                    |                         | Elderly                  |                  |                    |                         |
| <i>Males' prescriptions</i>   |                          |                  |                    |                         |                          |                  |                    |                         |                          |                  |                    |                         |
| Masculine appearance          | 1.36                     | 7.30             | 4.82               | 1.60                    | 1.84                     | 7.61             | 4.62               | 1.98                    | 0.59                     | 6.72             | 5.69               | 0.99                    |
| Masculine interests           | 0.72                     | 7.52             | 6.19               | 0.77                    | 1.17                     | 7.73             | 5.82               | 1.04                    | 0.72                     | 6.82             | 5.50               | 1.24                    |
| Agentic                       | 0.51                     | 7.22             | 6.18               | 0.30                    | 0.99                     | 8.39             | 6.84               | 0.87                    | 0.74                     | 6.82             | 5.43               | 1.01                    |
| Independent                   | --                       | --               | --                 | --                      | 0.94                     | 8.39             | 7.03               | 0.93                    | --                       | --               | --                 | --                      |
| Intelligent                   | --                       | --               | --                 | --                      | 0.74                     | 8.65             | 7.84               | 0.56                    | 0.69                     | 8.06             | 6.87               | 0.85                    |
| Sexually active               | --                       | --               | --                 | --                      | 0.58                     | 6.39             | 5.12               | 0.41                    | --                       | --               | --                 | --                      |
| Active                        | 0.45                     | 8.36             | 7.65               | 0.89                    | 0.56                     | 8.05             | 7.32               | 0.38                    | --                       | --               | --                 | --                      |
| <i>Females' prescriptions</i> |                          |                  |                    |                         |                          |                  |                    |                         |                          |                  |                    |                         |
| Communal                      | -0.73                    | 6.08             | 7.49               | -1.09                   | -0.92                    | 7.15             | 8.43               | -1.32                   | -0.64                    | 7.94             | 8.71               | -1.13                   |

|                               | Prescriptive<br><i>d</i> | Male<br><i>M</i> | Female<br><i>M</i> | Descriptive<br><i>d</i> | Prescriptive<br><i>d</i> | Male<br><i>M</i> | Female<br><i>M</i> | Descriptive<br><i>d</i> | Prescriptive<br><i>d</i> | Male<br><i>M</i> | Female<br><i>M</i> | Descriptive<br><i>d</i> |
|-------------------------------|--------------------------|------------------|--------------------|-------------------------|--------------------------|------------------|--------------------|-------------------------|--------------------------|------------------|--------------------|-------------------------|
|                               | Elementary-aged          |                  |                    |                         | Adults                   |                  |                    |                         | Elderly                  |                  |                    |                         |
| Feminine appearance           | -1.96                    | 2.49             | 6.09               | -2.65                   | --                       | --               | --                 | --                      | --                       | --               | --                 | --                      |
| Wholesome                     | --                       | --               | --                 | --                      | --                       | --               | --                 | --                      | -0.45                    | 5.96             | 6.88               | -0.57                   |
| <i>Males' proscriptions</i>   |                          |                  |                    |                         |                          |                  |                    |                         |                          |                  |                    |                         |
| Feminine appearance           | 1.96                     | 2.49             | 6.09               | -2.65                   | 1.95                     | 2.32             | 5.97               | -2.10                   | --                       | --               | --                 | --                      |
| Weak                          | 0.76                     | 2.83             | 4.28               | -0.91                   | 0.92                     | 1.85             | 3.15               | -1.21                   | 0.68                     | 3.27             | 4.49               | -0.98                   |
| Shy                           | 1.12                     | 3.82             | 5.60               | -1.19                   | 0.89                     | 3.29             | 4.66               | -1.19                   | --                       | --               | --                 | --                      |
| Emotional                     | 0.46                     | 2.90             | 3.75               | -0.79                   | 0.43                     | 2.46             | 3.21               | -1.64                   | --                       | --               | --                 | --                      |
| <i>Females' proscriptions</i> |                          |                  |                    |                         |                          |                  |                    |                         |                          |                  |                    |                         |
| Dominant                      | -0.56                    | 3.72             | 2.56               | 0.95                    | -0.84                    | 4.85             | 2.96               | 1.27                    | --                       | --               | --                 | --                      |
| Noisy                         | --                       | --               | --                 | --                      | -0.46                    | 3.15             | 2.46               | 0.26                    | --                       | --               | --                 | --                      |
| Sexually active               | --                       | --               | --                 | --                      | --                       | --               | --                 | --                      | -0.47                    | 3.25             | 2.35               | 0.68                    |

*Note.* Positive *d* scores reflect stronger prescriptions, procriptions, or descriptive stereotypes for males than females. Negative *d* scores reflect stronger prescriptions, procriptions, or descriptive stereotypes for females than males.

Table 2

*Prescriptive Stereotypes, Mean Desirability Ratings, and Descriptive Stereotypes for Males and Females by Age Group in Study 2*

|                               | Pres<br><i>d</i> | M<br><i>M</i> | F<br><i>M</i> | Des<br><i>d</i> | Pres<br><i>d</i>       | M<br><i>M</i> | F<br><i>M</i> | Des<br><i>d</i> | Pres<br><i>d</i> | M<br><i>M</i> | F<br><i>M</i> | Des<br><i>d</i> | Pres<br><i>d</i> | M<br><i>M</i> | F<br><i>M</i> | Des<br><i>d</i> | Pres<br><i>d</i> | M<br><i>M</i> | F<br><i>M</i> | Des<br><i>d</i> |  |
|-------------------------------|------------------|---------------|---------------|-----------------|------------------------|---------------|---------------|-----------------|------------------|---------------|---------------|-----------------|------------------|---------------|---------------|-----------------|------------------|---------------|---------------|-----------------|--|
|                               | Toddlers         |               |               |                 | Elementary School-Aged |               |               |                 | Adolescents      |               |               |                 | Young Adults     |               |               |                 | Adults           |               |               |                 |  |
| <i>Males' prescriptions</i>   |                  |               |               |                 |                        |               |               |                 |                  |               |               |                 |                  |               |               |                 |                  |               |               |                 |  |
| Masculine toys                | 2.88             | 7.47          | 3.63          | 3.14            | 1.99                   | 7.72          | 4.06          | 5.30            | 1.80             | 7.22          | 3.22          | 2.51            | 1.67             | 6.59          | 2.76          | 1.28            | --               | --            | --            | --              |  |
| Masculine appearance          | 2.66             | 7.32          | 3.58          | 2.80            | 2.15                   | 7.50          | 3.83          | 5.72            | 2.56             | 7.61          | 3.5           | 2.69            | 2.44             | 7.29          | 3.41          | 2.17            | 2.76             | 7.95          | 3.95          | 3.08            |  |
| Active                        | 1.22             | 7.84          | 6.42          | 0.91            | 1.21                   | 8.56          | 7.44          | 1.38            | 1.71             | 8.67          | 6.72          | 1.30            | 0.82             | 8.29          | 7.41          | 0.68            | 1.08             | 8.16          | 6.89          | 1.13            |  |
| Agentic                       | 0.81             | 7.00          | 5.74          | 1.13            | 0.56                   | 7.94          | 7.17          | 0.67            | 1.60             | 8.28          | 5.89          | 1.55            | 1.25             | 8.47          | 6.47          | 1.12            | 2.82             | 8.74          | 6.00          | 2.04            |  |
| Dominant                      | --               | --            | --            | --              | 1.58                   | 6.11          | 3.06          | 3.12            | --               | --            | --            | --              | --               | --            | --            | --              | 3.05             | 6.42          | 2.26          | 2.48            |  |
| Independent                   | --               | --            | --            | --              | 1.14                   | 7.94          | 6.28          | 0.69            | 0.99             | 8.17          | 6.89          | 0.76            | 0.93             | 8.24          | 7.00          | 0.72            | 2.24             | 8.74          | 6.42          | 1.46            |  |
| Masculine interests           | --               | --            | --            | --              | 0.65                   | 7.56          | 6.56          | 1.06            | 1.18             | 6.94          | 4.89          | 1.30            | 0.62             | 7.59          | 6.53          | 0.71            | 1.59             | 7.63          | 5.00          | 1.82            |  |
| Intelligent                   | --               | --            | --            | --              | --                     | --            | --            | --              | --               | --            | --            | --              | 0.58             | 8.35          | 7.65          | 0.36            | 1.02             | 8.68          | 7.74          | 0.82            |  |
| Sexually active               | --               | --            | --            | --              | --                     | --            | --            | --              | --               | --            | --            | --              | --               | --            | --            | --              | 0.90             | 6.16          | 4.42          | 1.01            |  |
| <i>Females' prescriptions</i> |                  |               |               |                 |                        |               |               |                 |                  |               |               |                 |                  |               |               |                 |                  |               |               |                 |  |
| Feminine appearance           | -3.29            | 2.11          | 6.95          | -5.03           | -2.94                  | 1.83          | 6.89          | -9.62           | -3.33            | 1.72          | 7.06          | -6.05           | -2.39            | 2.29          | 6.94          | -5.15           | -3.15            | 1.63          | 6.42          | -3.42           |  |

|                    | Pres<br><i>d</i> | M<br><i>M</i> | F<br><i>M</i> | Des<br><i>d</i> | Pres<br><i>d</i>       | M<br><i>M</i> | F<br><i>M</i> | Des<br><i>d</i> | Pres<br><i>d</i> | M<br><i>M</i> | F<br><i>M</i> | Des<br><i>d</i> | Pres<br><i>d</i> | M<br><i>M</i> | F<br><i>M</i> | Des<br><i>d</i> | Pres<br><i>d</i> | M<br><i>M</i> | F<br><i>M</i> | Des<br><i>d</i> |
|--------------------|------------------|---------------|---------------|-----------------|------------------------|---------------|---------------|-----------------|------------------|---------------|---------------|-----------------|------------------|---------------|---------------|-----------------|------------------|---------------|---------------|-----------------|
|                    | Toddlers         |               |               |                 | Elementary School-Aged |               |               |                 | Adolescents      |               |               |                 | Young Adults     |               |               |                 | Adults           |               |               |                 |
| Feminine toys      | -2.35            | 2.79          | 7.26          | -4.31           | -3.59                  | 2.22          | 7.67          | -5.90           | -3.75            | 1.28          | 6.67          | -4.47           | -2.80            | 1.53          | 6.35          | -2.30           | --               | --            | --            | --              |
| Communal           | -0.85            | 6.63          | 7.89          | -2.19           | -1.65                  | 5.39          | 8.11          | -3.27           | -2.19            | 5.06          | 8.33          | -2.94           | -2.57            | 5.94          | 8.71          | -3.43           | -1.99            | 5.32          | 8.47          | -2.23           |
| Feminine interests | -0.48            | 6.32          | 7.05          | -0.29           | -0.99                  | 6.11          | 7.67          | -1.43           | -1.14            | 5.17          | 7.00          | -1.65           | -1.29            | 5.41          | 7.41          | -1.21           | -1.31            | 5.32          | 7.26          | -1.81           |
| Shy                | --               | --            | --            | --              | -1.41                  | 3.78          | 6.28          | -2.18           | --               | --            | --            | --              | --               | --            | --            | --              | --               | --            | --            | --              |
| Wholesome          | --               | --            | --            | --              | -1.32                  | 5.56          | 7.83          | -1.59           | -1.33            | 5.33          | 7.39          | -1.63           | -0.94            | 5.47          | 7.24          | -1.59           | -0.72            | 4.68          | 6.11          | -1.25           |
| Likeable           | --               | --            | --            | --              | -0.55                  | 7.67          | 8.22          | -1.24           | -1.31            | 7.17          | 8.61          | -0.89           | --               | --            | --            | --              | --               | --            | --            | --              |
| Helpful            | --               | --            | --            | --              | -0.48                  | 7.44          | 7.94          | -1.39           | -0.77            | 6.83          | 8.00          | -1.03           | -0.49            | 7.24          | 7.82          | -0.76           | -0.56            | 7.05          | 7.79          | -1.57           |

*Males' prescriptions*

|                     |      |      |      |       |      |      |      |       |      |      |      |       |      |      |      |       |      |      |      |       |
|---------------------|------|------|------|-------|------|------|------|-------|------|------|------|-------|------|------|------|-------|------|------|------|-------|
| Feminine appearance | 3.29 | 2.11 | 6.95 | -5.03 | 2.94 | 1.83 | 6.89 | -9.62 | 3.33 | 1.72 | 7.06 | -6.05 | 2.39 | 2.29 | 6.94 | -5.15 | 3.15 | 1.63 | 6.42 | -3.42 |
| Feminine toys       | 2.35 | 2.79 | 7.26 | -4.31 | 3.59 | 2.22 | 7.67 | -5.90 | 3.75 | 1.28 | 6.67 | -4.47 | 2.80 | 1.53 | 6.35 | -2.30 | 1.15 | 1.84 | 4.37 | -1.31 |
| Emotional           | 0.82 | 2.53 | 3.89 | -0.92 | 1.43 | 2.44 | 4.89 | -3.51 | 1.38 | 1.78 | 3.72 | -2.84 | 1.02 | 2.00 | 3.82 | -2.35 | 0.98 | 1.95 | 3.42 | -3.00 |
| Weak                | 0.55 | 2.84 | 3.74 | -0.92 | 1.12 | 2.44 | 4.28 | -2.43 | 1.99 | 1.5  | 4.17 | -2.00 | 1.21 | 1.76 | 3.53 | -1.06 | 1.48 | 1.58 | 3.53 | -1.94 |
| Shy                 | --   | --   | --   | --    | 1.41 | 3.78 | 6.28 | -2.18 | 1.39 | 2.72 | 5.00 | -1.01 | 1.43 | 2.76 | 4.71 | -1.93 | 1.72 | 3.16 | 5.26 | -1.89 |

|                               | Pres<br><i>d</i> | M<br><i>M</i> | F<br><i>M</i> | Des<br><i>d</i> | Pres<br><i>d</i>       | M<br><i>M</i> | F<br><i>M</i> | Des<br><i>d</i> | Pres<br><i>d</i> | M<br><i>M</i> | F<br><i>M</i> | Des<br><i>d</i> | Pres<br><i>d</i> | M<br><i>M</i> | F<br><i>M</i> | Des<br><i>d</i> | Pres<br><i>d</i> | M<br><i>M</i> | F<br><i>M</i> | Des<br><i>d</i> |  |
|-------------------------------|------------------|---------------|---------------|-----------------|------------------------|---------------|---------------|-----------------|------------------|---------------|---------------|-----------------|------------------|---------------|---------------|-----------------|------------------|---------------|---------------|-----------------|--|
|                               | Toddlers         |               |               |                 | Elementary School-Aged |               |               |                 | Adolescents      |               |               |                 | Young Adults     |               |               |                 | Adults           |               |               |                 |  |
| <i>Females' proscriptions</i> |                  |               |               |                 |                        |               |               |                 |                  |               |               |                 |                  |               |               |                 |                  |               |               |                 |  |
| Masculine toys                | -2.88            | 7.47          | 3.63          | 3.14            | --                     | --            | --            | --              | -1.80            | 7.22          | 3.22          | 2.51            | -1.67            | 6.59          | 2.76          | 1.28            | -0.87            | 4.79          | 2.84          | 1.05            |  |
| Masculine appearance          | -2.66            | 7.32          | 3.58          | 2.80            | 2.15                   | 7.50          | 3.83          | 5.72            | -2.56            | 7.61          | 3.5           | 2.69            | -2.44            | 7.29          | 3.41          | 2.17            | -2.76            | 7.95          | 3.95          | 3.08            |  |
| Noisy                         | -0.80            | 4.00          | 2.74          | 1.38            | 0.77                   | 4.67          | 3.06          | 1.51            | -0.70            | 4.00          | 2.61          | 1.56            | -1.19            | 3.65          | 1.94          | 2.25            | -1.26            | 4.32          | 2.53          | 1.56            |  |
| Dominant                      | --               | --            | --            | --              | 1.58                   | 6.11          | 3.06          | 3.12            | -1.36            | 5.61          | 2.61          | 2.35            | -1.48            | 5.82          | 2.71          | 3.14            | -3.05            | 6.42          | 2.26          | 2.48            |  |
| Rebellious                    | --               | --            | --            | --              | -0.55                  | 3.89          | 3.11          | 1.86            | --               | --            | --            | --              | -1.00            | 2.94          | 1.82          | 2.45            | -1.10            | 3.58          | 2.05          | 1.38            |  |

*Note.* Pres = prescriptive, M = male, F = female, Des = descriptive. Positive *d* scores reflect stronger prescriptions, proscriptions, or descriptive stereotypes for males than females. Negative *d* scores reflect stronger prescriptions, proscriptions, or descriptive stereotypes for females than males.

Table S3

*Positive Prescriptive Stereotypes, Mean Desirability Ratings, and Descriptive Stereotypes for Males and Females by Age Group in Study 3*

| Trait                       | Prescriptive<br><i>d</i> | Male<br><i>M</i> | Female<br><i>M</i> | Descriptive<br><i>d</i> | Prescriptive<br><i>d</i> | Male<br><i>M</i> | Female<br><i>M</i> | Descriptive<br><i>d</i> | Prescriptive<br><i>d</i> | Male<br><i>M</i> | Female<br><i>M</i> | Descriptive<br><i>d</i> |
|-----------------------------|--------------------------|------------------|--------------------|-------------------------|--------------------------|------------------|--------------------|-------------------------|--------------------------|------------------|--------------------|-------------------------|
| <i>Males' prescriptions</i> | Toddlers                 |                  |                    |                         | Elementary-aged          |                  |                    |                         | Adolescents              |                  |                    |                         |
| Masculine toys              | 1.01                     | 7.40             | 4.86               | 0.89                    | 1.30                     | 7.40             | 4.56               | 1.10                    | --                       | --               | --                 | --                      |
| Masculine appearance        | --                       | --               | --                 | --                      | 1.01                     | 6.97             | 4.81               | 0.63                    | 0.96                     | 6.93             | 4.86               | 0.71                    |
| Masculine interests         | --                       | --               | --                 | --                      | --                       | --               | --                 | --                      | 0.49                     | 7.66             | 6.75               | 0.44                    |
|                             | Young Adults             |                  |                    |                         | Adults                   |                  |                    |                         | Elderly                  |                  |                    |                         |
| Masculine toys              | --                       | --               | --                 | --                      | --                       | --               | --                 | --                      | --                       | --               | --                 | --                      |
| Masculine appearance        | 0.91                     | 6.86             | 4.96               | 0.71                    | 0.58                     | 6.67             | 5.52               | 0.22                    | --                       | --               | --                 | --                      |
| Masculine interests         | 0.75                     | 7.83             | 6.41               | 0.49                    | 0.51                     | 7.7              | 6.7                | 1.11                    | 0.48                     | 6.77             | 5.73               | 0.92                    |
| Agentic                     | 0.70                     | 8.00             | 6.85               | 0.36                    | 0.71                     | 8.13             | 7.13               | 0.56                    | --                       | --               | --                 | --                      |
| Intelligent                 | 0.49                     | 8.00             | 7.19               | 0.22                    | --                       | --               | --                 | --                      | --                       | --               | --                 | --                      |
| Independent                 | --                       | --               | --                 | --                      | 0.54                     | 8.2              | 7.37               | -0.10                   | --                       | --               | --                 | --                      |

| Trait                         | Prescriptive<br><i>d</i> | Male<br><i>M</i> | Female<br><i>M</i> | Descriptive<br><i>d</i> | Prescriptive<br><i>d</i> | Male<br><i>M</i> | Female<br><i>M</i> | Descriptive<br><i>d</i> | Prescriptive<br><i>d</i> | Male<br><i>M</i> | Female<br><i>M</i> | Descriptive<br><i>d</i> |
|-------------------------------|--------------------------|------------------|--------------------|-------------------------|--------------------------|------------------|--------------------|-------------------------|--------------------------|------------------|--------------------|-------------------------|
| <i>Females' prescriptions</i> | Toddlers                 |                  |                    |                         | Elementary-aged          |                  |                    |                         | Adolescents              |                  |                    |                         |
| Feminine toys                 | -2.13                    | 3.5              | 7.97               | -1.55                   | -2.26                    | 2.73             | 7.04               | -1.93                   | --                       | --               | --                 | --                      |
| Feminine appearance           | -1.59                    | 2.7              | 6.07               | -1.48                   | --                       | --               | --                 | --                      | -1.83                    | 2.45             | 6.04               | -1.04                   |
| Active                        | -0.50                    | 7.13             | 8.00               | -0.15                   | --                       | --               | --                 | --                      | --                       | --               | --                 | --                      |
| Communal                      | --                       | --               | --                 | --                      | -0.72                    | 6.47             | 7.56               | -0.09                   | -0.43                    | 6.76             | 7.43               | -0.29                   |
| Feminine interests            | --                       | --               | --                 | --                      | -0.61                    | 6.33             | 7.56               | -0.55                   | -0.70                    | 6.76             | 7.93               | -0.83                   |
| Likeable                      | --                       | --               | --                 | --                      | -0.48                    | 7.57             | 8.11               | -0.39                   | -0.55                    | 7.38             | 8.11               | -0.41                   |
|                               | Young Adults             |                  |                    |                         | Adults                   |                  |                    |                         | Elderly                  |                  |                    |                         |
| Feminine toys                 | --                       | --               | --                 | --                      | --                       | --               | --                 | --                      | --                       | --               | --                 | --                      |
| Feminine appearance           | --                       | --               | --                 | --                      | --                       | --               | --                 | --                      | --                       | --               | --                 | --                      |
| Active                        | --                       | --               | --                 | --                      | --                       | --               | --                 | --                      | --                       | --               | --                 | --                      |
| Communal                      | -0.76                    | 6.72             | 8.04               | -0.28                   | -0.78                    | 7.43             | 8.43               | -0.89                   | -0.61                    | 7.53             | 8.19               | -0.37                   |



| Trait              | Prescriptive | Male     | Female   | Descriptive | Prescriptive | Male     | Female   | Descriptive | Prescriptive | Male     | Female   | Descriptive |
|--------------------|--------------|----------|----------|-------------|--------------|----------|----------|-------------|--------------|----------|----------|-------------|
|                    | <i>d</i>     | <i>M</i> | <i>M</i> | <i>d</i>    | <i>d</i>     | <i>M</i> | <i>M</i> | <i>d</i>    | <i>d</i>     | <i>M</i> | <i>M</i> | <i>d</i>    |
| Feminine interests | --           | --       | --       | --          | -0.48        | 6.77     | 7.59     | -0.27       | --           | --       | --       | --          |
| Likeable)          | --           | --       | --       | --          | --           | --       | --       | --          | --           | --       | --       | --          |

*Note.* Positive *d* scores reflect stronger prescriptions or descriptive stereotypes for males than females. Negative *d* scores reflect stronger prescriptions or descriptive stereotypes for females than males.

Table S4

*Negative Proscriptive Stereotypes, Mean Desirability Ratings, and Descriptive Stereotypes for Males and Females by Age Group in Study 3*

| Trait                       | Prescriptive<br><i>d</i> | Male<br><i>M</i> | Female<br><i>M</i> | Descriptive<br><i>d</i> | Prescriptive<br><i>d</i> | Male<br><i>M</i> | Female<br><i>M</i> | Descriptive<br><i>d</i> | Prescriptive<br><i>d</i> | Male<br><i>M</i> | Female<br><i>M</i> | Descriptive<br><i>d</i> |
|-----------------------------|--------------------------|------------------|--------------------|-------------------------|--------------------------|------------------|--------------------|-------------------------|--------------------------|------------------|--------------------|-------------------------|
| <i>Males' proscriptions</i> | Toddlers                 |                  |                    |                         | Elementary-aged          |                  |                    |                         | Adolescents              |                  |                    |                         |
| Feminine toys               | 2.13                     | 3.5              | 7.97               | -1.55                   | 2.26                     | 2.73             | 7.04               | -1.93                   | 0.98                     | 2.17             | 4.39               | -0.45                   |
| Feminine appearance         | 1.59                     | 2.7              | 6.07               | -1.48                   | 1.79                     | 2.20             | 5.74               | -1.41                   | 1.83                     | 2.45             | 6.04               | -1.04                   |
| Shy                         | 0.47                     | 3.97             | 5.1                | 0.00                    | --                       | --               | --                 | --                      | 0.55                     | 3.62             | 4.79               | -0.05                   |
|                             | Young Adults             |                  |                    |                         | Adults                   |                  |                    |                         | Elderly                  |                  |                    |                         |
| Feminine toys               | 0.91                     | 1.55             | 3.41               | -0.08                   | 0.81                     | 1.67             | 3.17               | -0.02                   | 0.82                     | 1.53             | 3.00               | 0.24                    |
| Feminine appearance         | 2.18                     | 2.24             | 5.81               | -1.47                   | 2.12                     | 2.03             | 5.47               | -0.99                   | 0.66                     | 2.7              | 4.04               | -0.19                   |
| Shy                         | 0.71                     | 3.03             | 4.56               | 0.18                    | --                       | --               | --                 | --                      | --                       | --               | --                 | --                      |
| Emotional                   | 0.51                     | 2.17             | 3.11               | -0.27                   | --                       | --               | --                 | --                      | --                       | --               | --                 | --                      |
| Weak                        | 0.40                     | 2.1              | 2.85               | -0.05                   | 0.39                     | 1.87             | 2.5                | 0.08                    | --                       | --               | --                 | --                      |

| Trait                         | Prescriptive<br><i>d</i> | Male<br><i>M</i> | Female<br><i>M</i> | Descriptive<br><i>d</i> | Prescriptive<br><i>d</i> | Male<br><i>M</i> | Female<br><i>M</i> | Descriptive<br><i>d</i> | Prescriptive<br><i>d</i> | Male<br><i>M</i> | Female<br><i>M</i> | Descriptive<br><i>d</i> |
|-------------------------------|--------------------------|------------------|--------------------|-------------------------|--------------------------|------------------|--------------------|-------------------------|--------------------------|------------------|--------------------|-------------------------|
| <i>Females' proscriptions</i> | Toddlers                 |                  |                    |                         | Elementary-aged          |                  |                    |                         | Adolescents              |                  |                    |                         |
| Dominant                      | --                       | --               | --                 | --                      | -0.45                    | 3.17             | 2.26               | 0.38                    | --                       | --               | --                 | --                      |
| Noisy                         | --                       | --               | --                 | --                      | -0.43                    | 5.07             | 3.93               | 0.07                    | -0.51                    | 4.41             | 3.21               | 0.11                    |
| Sexually active               | --                       | --               | --                 | --                      | --                       | --               | --                 | --                      | -0.71                    | 3.59             | 1.93               | 0.18                    |
| Masculine toys                | --                       | --               | --                 | --                      | --                       | --               | --                 | --                      | -0.57                    | 4.79             | 3.36               | 0.76                    |
|                               | Young Adults             |                  |                    |                         | Adults                   |                  |                    |                         | Elderly                  |                  |                    |                         |
| Dominant                      | -0.54                    | 3.79             | 2.52               | 0.48                    | --                       | --               | --                 | --                      | --                       | --               | --                 | --                      |
| Noisy                         | --                       | --               | --                 | --                      | -0.46                    | 3.17             | 2.3                | 0.16                    | --                       | --               | --                 | --                      |
| Sexually active               | --                       | --               | --                 | --                      | --                       | --               | --                 | --                      | --                       | --               | --                 | --                      |
| Masculine toys                | -0.49                    | 3.97             | 2.78               | 0.61                    | --                       | --               | --                 | --                      | --                       | --               | --                 | --                      |
| Rebellious                    | --                       | --               | --                 | --                      | --                       | --               | --                 | --                      | -0.52                    | 3.2              | 2.08               | 0.60                    |

*Note.* Positive *d* scores reflect stronger proscriptions or descriptive stereotypes for males than females. Negative *d* scores reflect stronger proscriptions or descriptive stereotypes for females than males.
